# Supplementary figures and images for: A novel and universal method for microRNA RT-qPCR data normalization
Source: Springer Nature journal article supplement (doi:10.1186/gb-2009-10-6-r64), 2009-06-16

**A**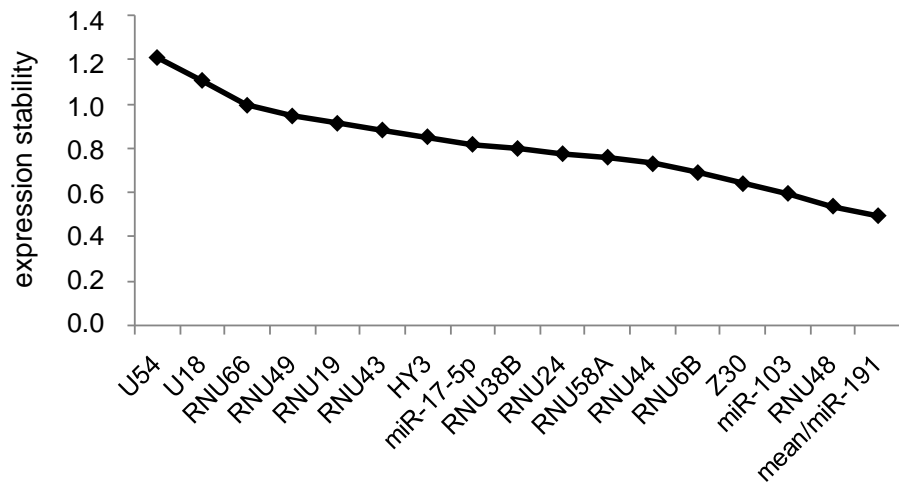**B**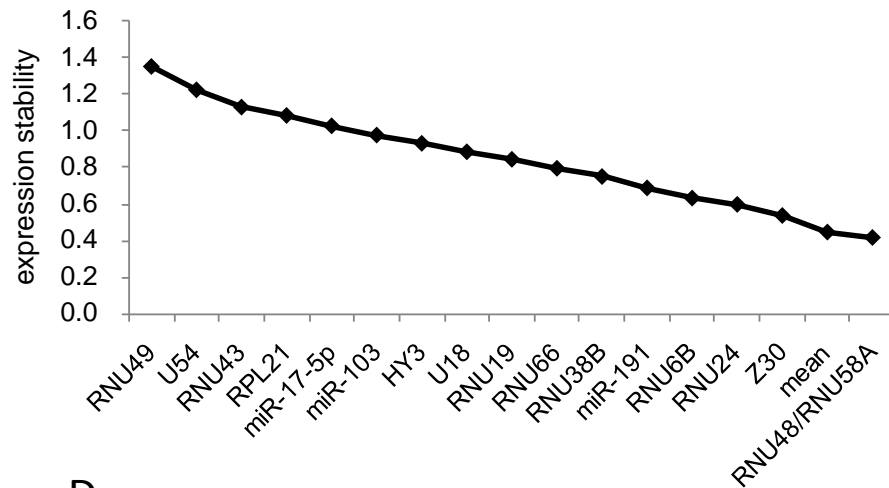**C**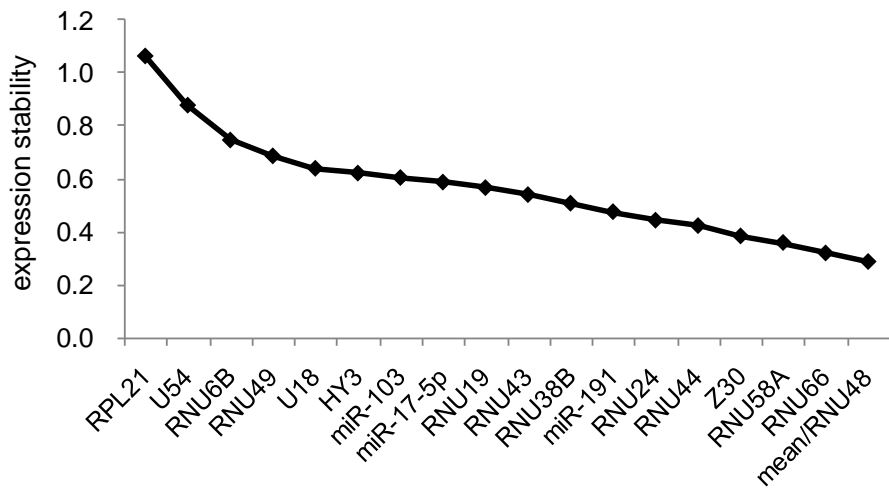**D**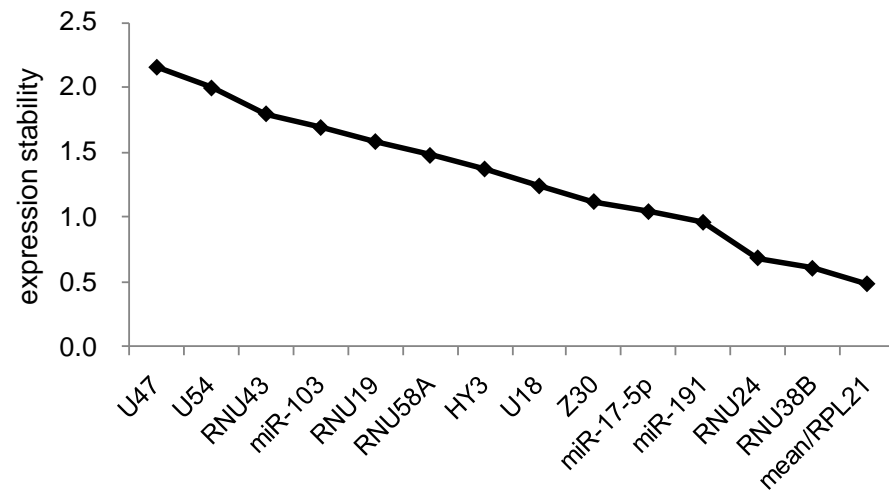

Supplement: Additional file 1 [file gb-2009-10-6-r64-s1.pdf]
